# Supplementary material for: Sewage effluent from an Indian hospital harbors novel carbapenemases and integron-borne antibiotic resistance genes
Source: PubMed Central journal article supplement (PMC6598227; doi:10.1186/s40168-019-0710-x), 2019-06-27
Supplement: 40168_2019_710_MOESM11_ESM.pdf [file 40168_2019_710_MOESM11_ESM.pdf]

*glyoxalase II*

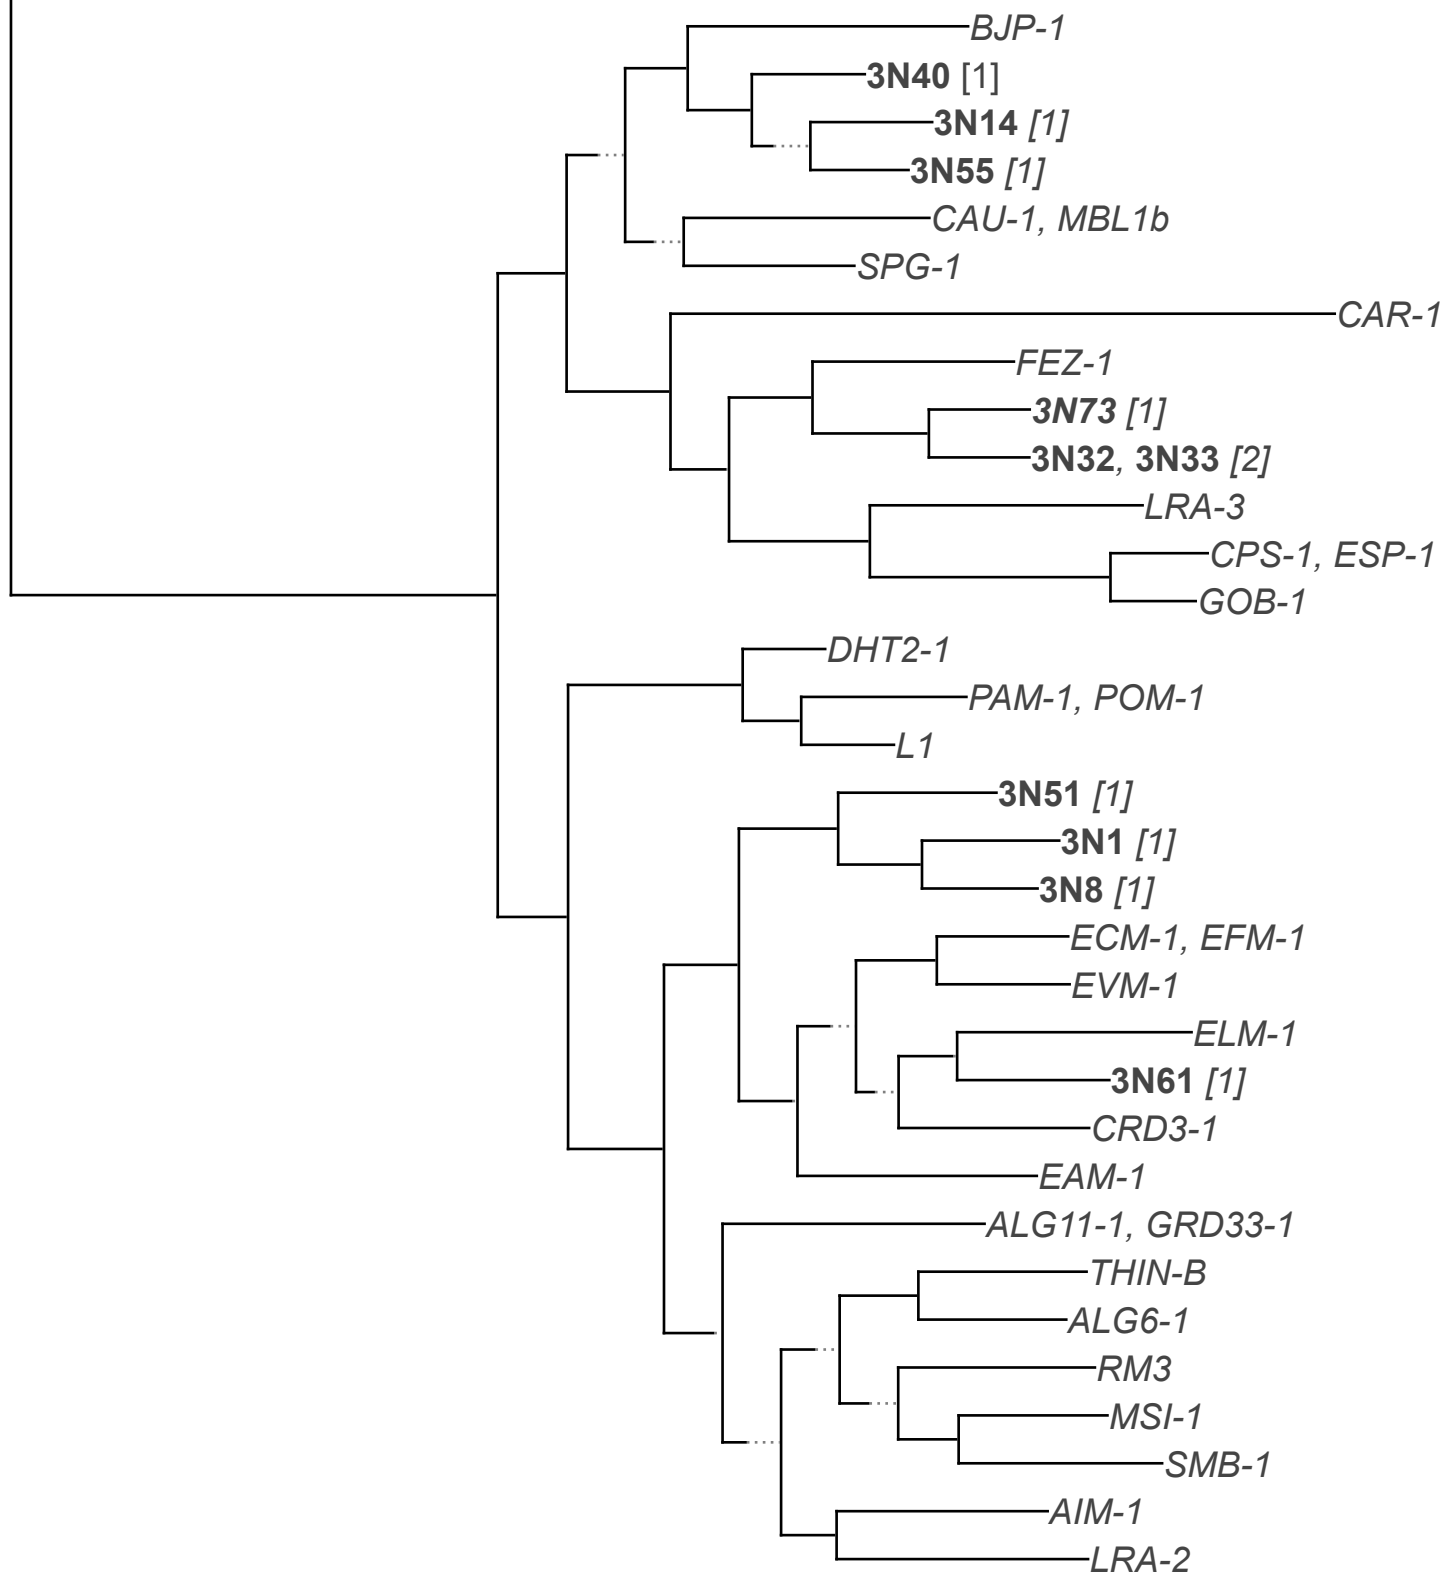

0.31
